# Supplementary material for: Plastics to fertilizers: chemical recycling of a bio-based polycarbonate as a fertilizer source
Source: Royal Society of Chemistry journal article supplement (doi:10.1039/d1gc02327f), 2021-01-01
Supplement: d1gc02327f1.pdf [file d1gc02327f1.pdf]

# Electronic supplementary information

## Plastics to Fertilizers: Chemical Recycling of a Bio-based Polycarbonate to a Fertilizer Source

Takumi Abe,<sup>a</sup> Rikito Takashima,<sup>a</sup> Takehiro Kamiya,<sup>b</sup> Choon Pin Foong,<sup>c</sup> Keiji Numata,<sup>c</sup> Daisuke Aoki,<sup>\*a, d</sup> and Hideyuki Otsuka<sup>\*a</sup>

<sup>a</sup>*Department of Chemical Science and Engineering, Tokyo Institute of Technology, 2-12-1 Ookayama, Meguro-ku, Tokyo 152-8550, Japan.*

<sup>b</sup>*Department of Applied Biological Chemistry, Graduate School of Agricultural and Life Sciences, The University of Tokyo, Tokyo 113-8657, Japan.*

<sup>c</sup>*Department of material chemistry, Graduate School of Engineering, Kyoto University, Kyoto 615-8510, Japan.*

<sup>d</sup>*JST-PRESTO, 2-12-1 Ookayama, Meguro-ku, Tokyo 152-8550, Japan.*

### Corresponding Authors

\* D. Aoki. Email: aoki.d.aa@m.titech.ac.jp

\* H. Otsuka. Email: otsuka@mac.titech.ac.jp

### Table of Contents

|                                |     |
|--------------------------------|-----|
| 1. Experimental procedure..... | S2  |
| 2. Ammonolysis evaluation..... | S5  |
| 3. Plant-growth test.....      | S17 |

## 1. Experimental procedure

### 1.1. Synthesis of PIC

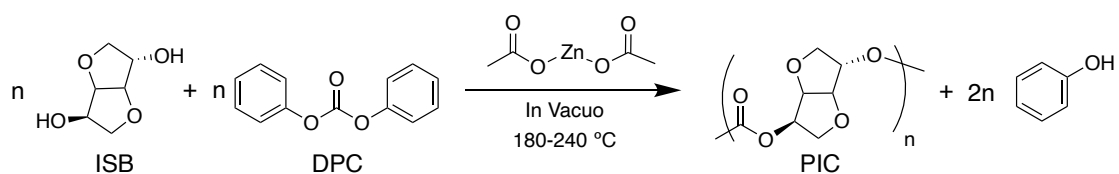

Scheme S-1. Synthesis of PIC.

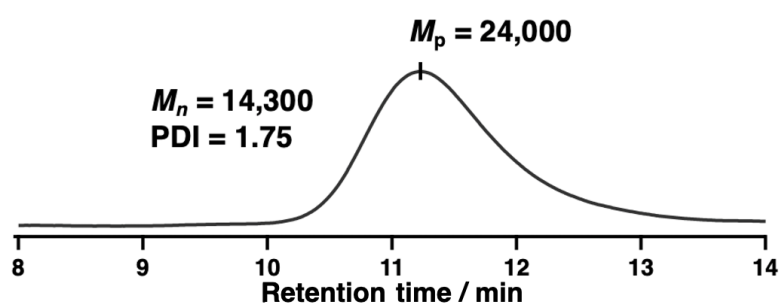

Figure S-1. GPC profile of PIC (eluent: DMF, detector: RI, polystyrene standard).

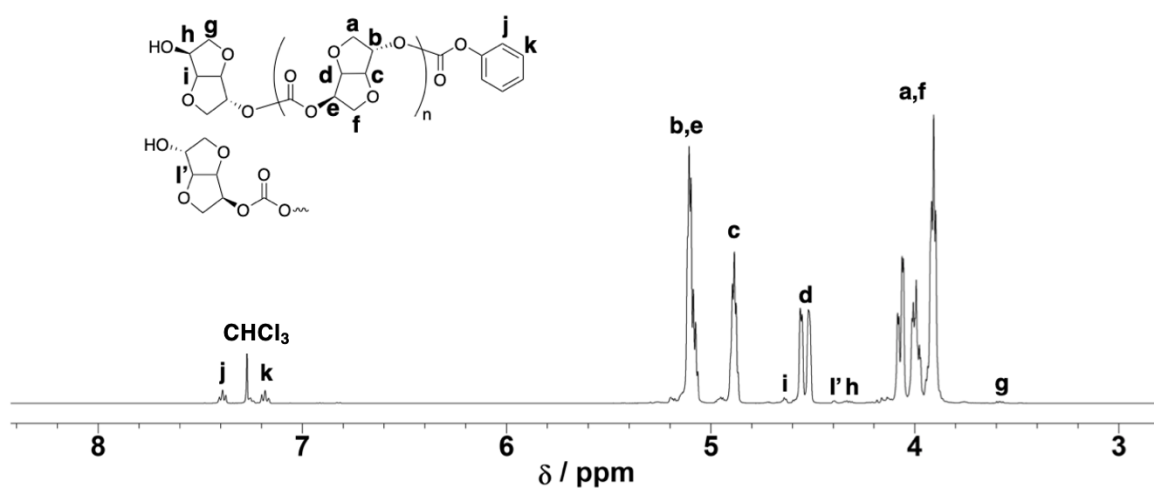

Figure S-2.  $^1\text{H}$  NMR spectrum of PIC (500 MHz, 25 °C,  $\text{CDCl}_3$ ).

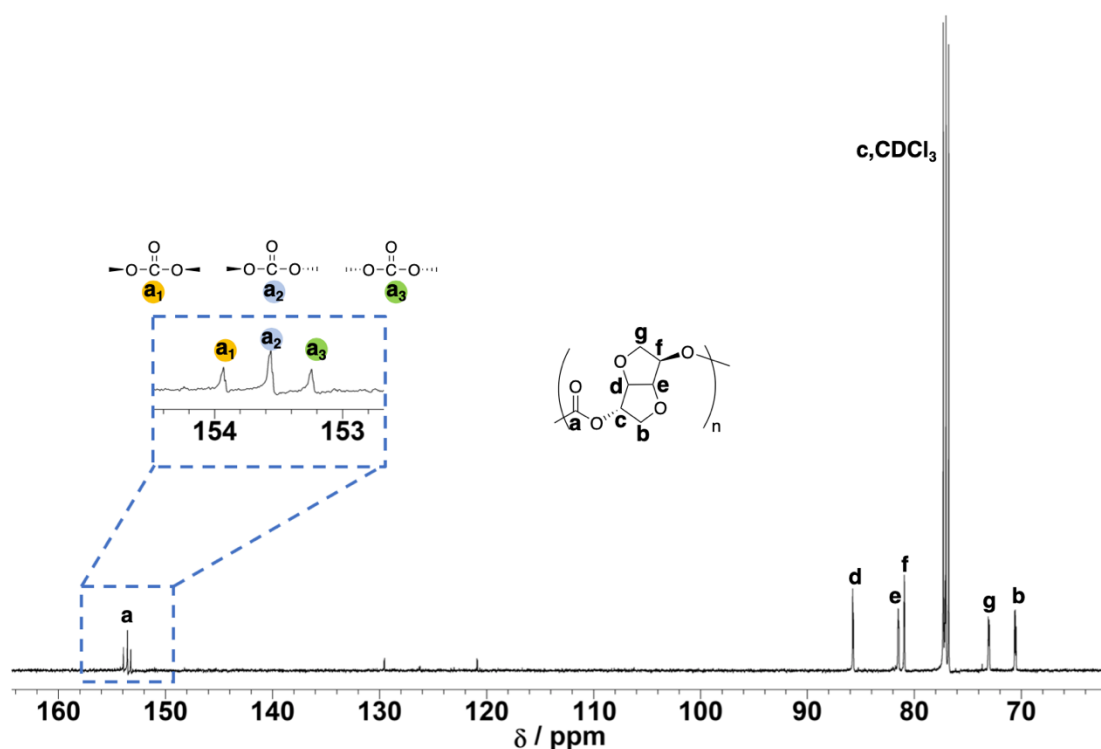

Figure S-3.  $^{13}\text{C}$  NMR spectrum of PIC (125 MHz, 25 °C,  $\text{CDCl}_3$ ).

## 1.2. Synthesis of ISB-DC<sup>1</sup>

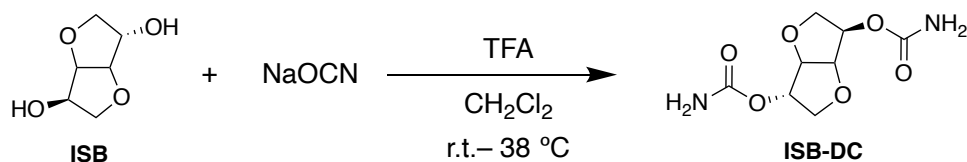

Scheme S-2. Synthesis of ISB-DC.

ISB (5.00 g, 34.2 mmol), sodium cyanate (8.91 g, 137 mmol), and 20 mL of dichloromethane were placed in a round-bottomed flask (50 mL). While stirring slowly at room temperature, trifluoroacetic acid ( $\text{TFA}$ , 12 mL) was added dropwise over a period of 10 min. The temperature was increased to 38 °C and maintained for 30 min, and the mixture was then cooled down to room temperature and continued to stir slowly for 2 h. After this time, a pasty white precipitate was observed, which was washed with methylene chloride and water, filtered, and dried under vacuum. ISB-DC was obtained as a white solid (yield: 1.98 g, 25.9%).  $^1\text{H}$  NMR (500 MHz,  $\text{DMSO}-d_6$ ):  $\delta/\text{ppm}$  = 6.83–6.36 (br, 4H), 4.93 (dd,  $J$  = 10.8, 5.4 Hz, 1H), 4.90–4.86 (m, 1H), 4.66 (t,  $J$  = 5.1 Hz, 1H), 4.39–4.35 (m, 1H), 3.39–3.76 (m, 3H), 3.64–3.59 (m, 1H).

### 1.3. Ammonolysis of ISB-DC

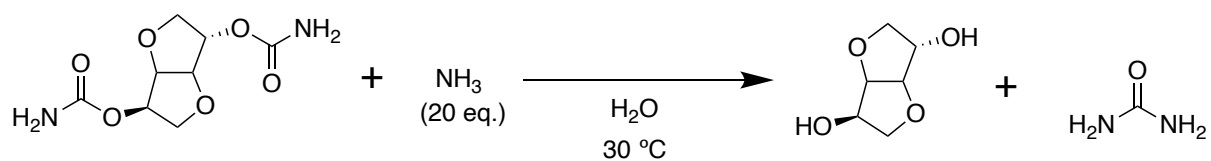

**Scheme S-3.** Ammonolysis of ISB-DC.

ISB-DC (50.0 mg) was placed in a round-bottomed flask (20 mL). Then, water (3.72 mL) and aqueous ammonia (14.8 mol/L, 1.24 mL) were added to the flask. The reaction mixture was stirred for 24 h, and the reaction mixture was then freeze-dried to remove the ammonia and water. The dried degradation product was used for  $^1\text{H}$  NMR measurement.

## 2. Ammonolysis evaluation

### 2.1. Ammonolysis under initial reaction condition

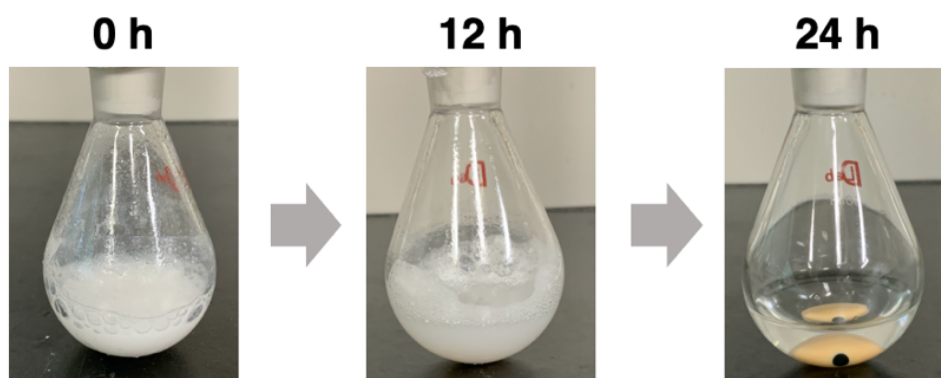

Figure S-4. Photographs of the reaction mixture during ammonolysis.

### 2.2. Analysis of the degradation products

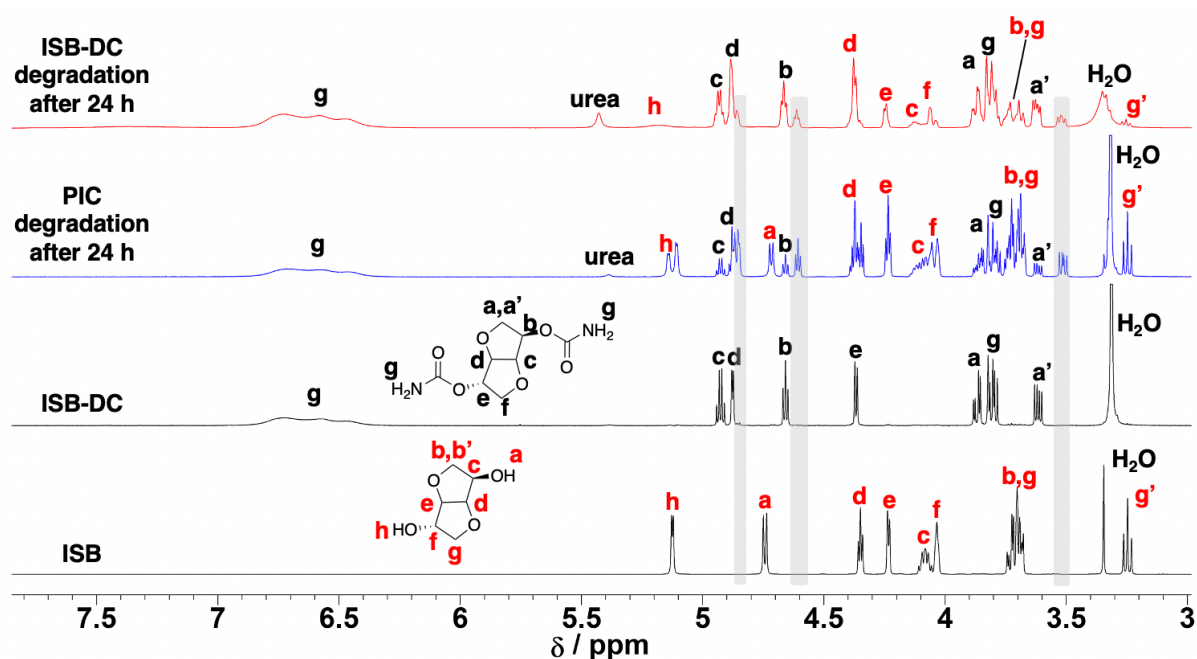

Figure S-5. <sup>1</sup>H NMR spectrum of the degradation product of **ISB-DC** after 24 h ammonolysis (red) compared with the degradation product of **PIC** after 24 h ammonolysis (blue) and raw materials (**ISB** and **ISB-DC**) (500 MHz, 25 °C, DMSO-*d*<sub>6</sub>).

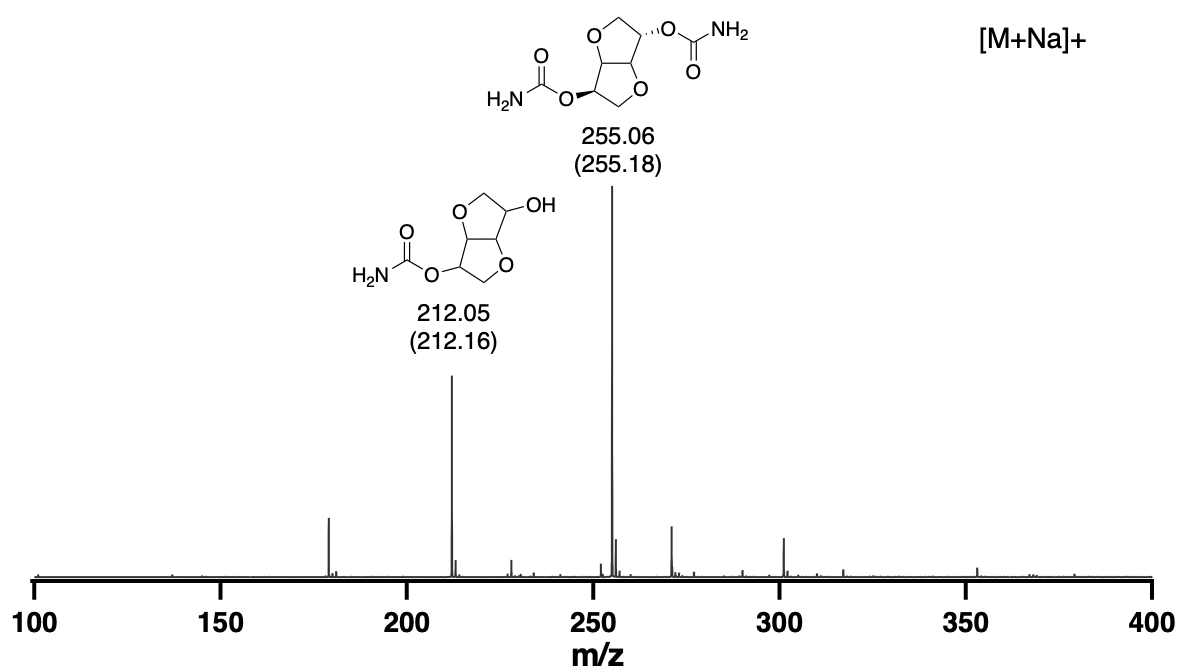

**Figure S-6.** ESI-TOF MS spectrum for the degradation products (all peaks were detected as  $[M+Na]^+$ ).

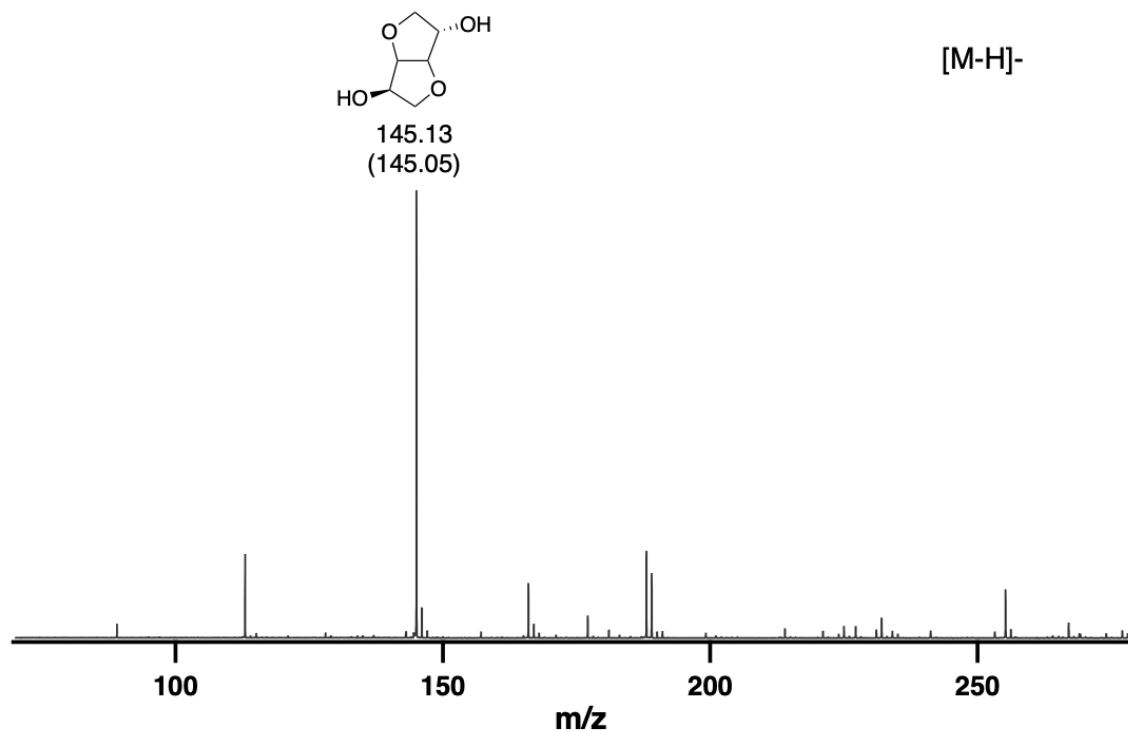

**Figure S-7.** ESI-TOF MS spectrum for the degradation products (all peaks were detected as  $[M-H]^-$ ).

### 2.3. Preparation of Calibration curve for ammonolysis of PIC

The samples whose stoichiometric ratios of carbonate bond in PIC to ISB and urea were 10/0/0, 7/3/3, 5/5/5, 3/7/7, 1/9/9 and 0/10/10, were mixed in mortar to prepare degradation standard samples. Each sample was regarded as virtual depolymerized product (for example, the sample which was mixed at the ratio of 7/3/3 stated above was regarded as 30% degradation product; note that all degradation products were assumed to have been completely converted to urea and ISB). Then, the standard samples were analyzed by FT-IR. From the FT-IR spectra, the ratio of transmittance of C=O stretching derived from PIC to the sum of transmittance of C–H stretching derived from PIC and ISB were calculated and plotted against the mixing ratio.

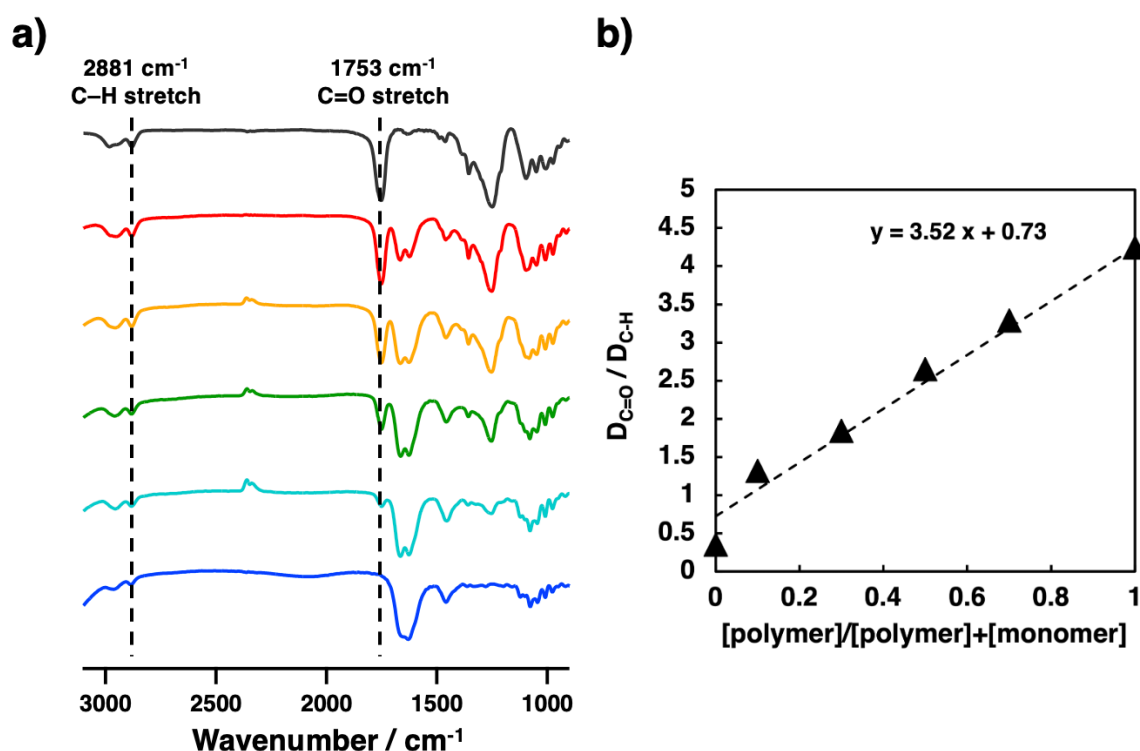

**Figure S-8.** (a) FT-IR spectra of the standard samples for preparation of the calibration curve (KBr) and (b) Calibration curve for estimation of the remaining carbonate bonds in the degradation products.

## 2.4. Ammonolysis under different $[\text{NH}_3]_0/[\text{PIC}]_0$ condition

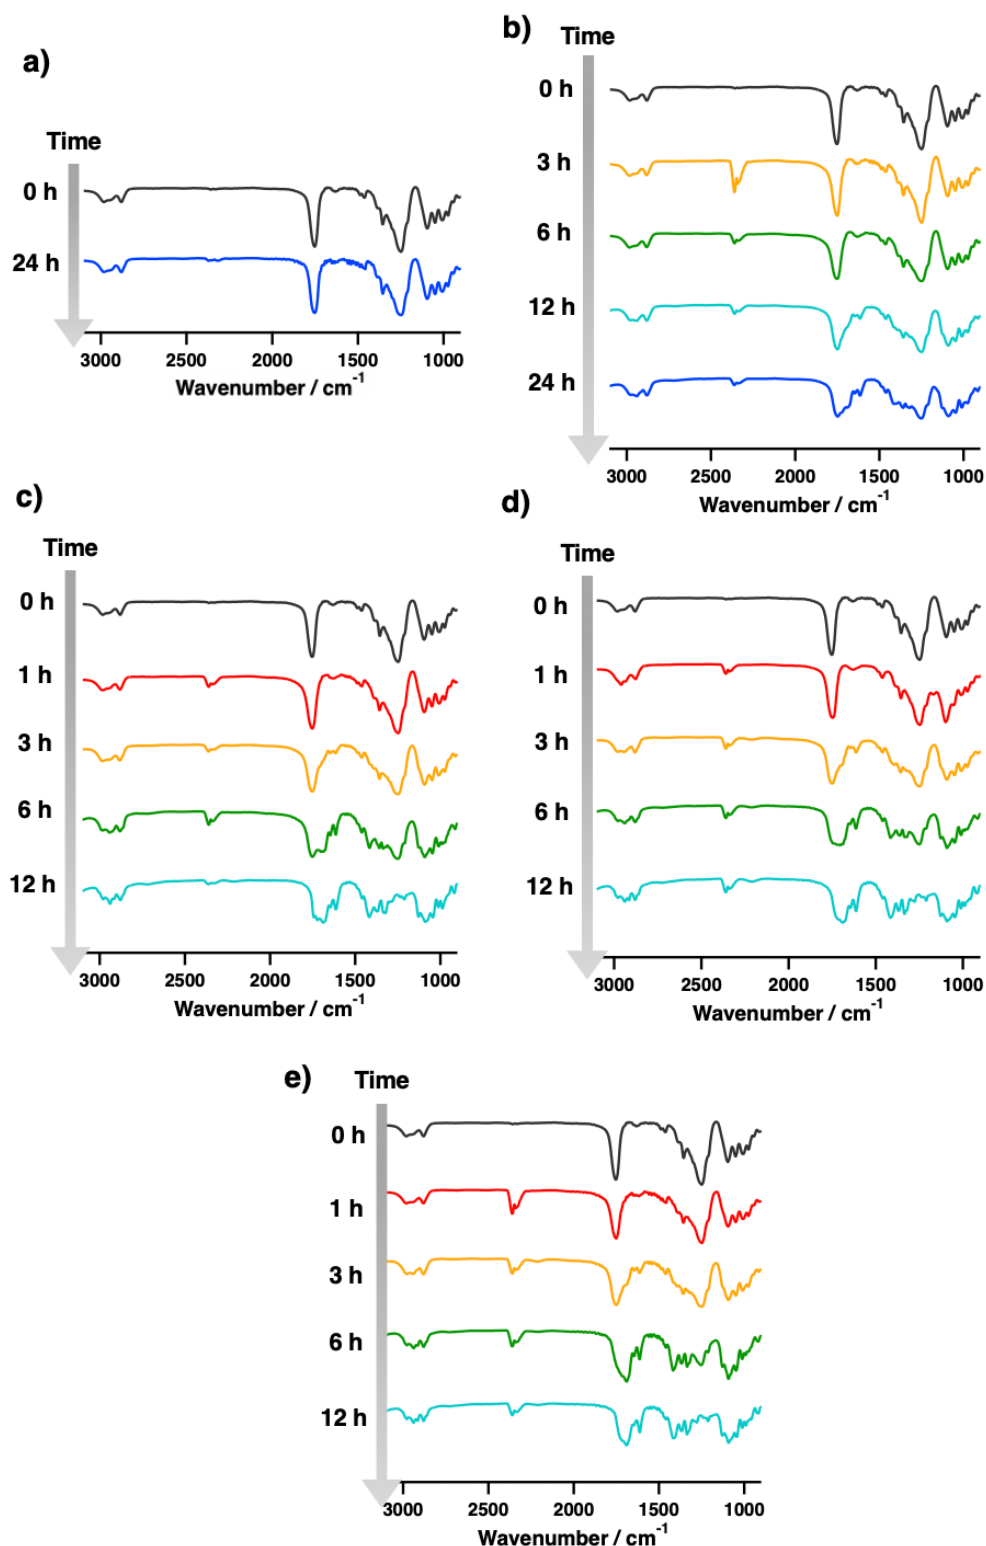

**Figure S-9.** FT-IR spectra of the degradation products during ammonolysis under the reaction condition of (a)  $[\text{NH}_3]_0/[\text{PIC}]_0 = 0$ , (b)  $[\text{NH}_3]_0/[\text{PIC}]_0 = 10$ , (c)  $[\text{NH}_3]_0/[\text{PIC}]_0 = 30$ , (d)  $[\text{NH}_3]_0/[\text{PIC}]_0 = 40$  and (e)  $[\text{NH}_3]_0/[\text{PIC}]_0 = 50$ . (KBr)



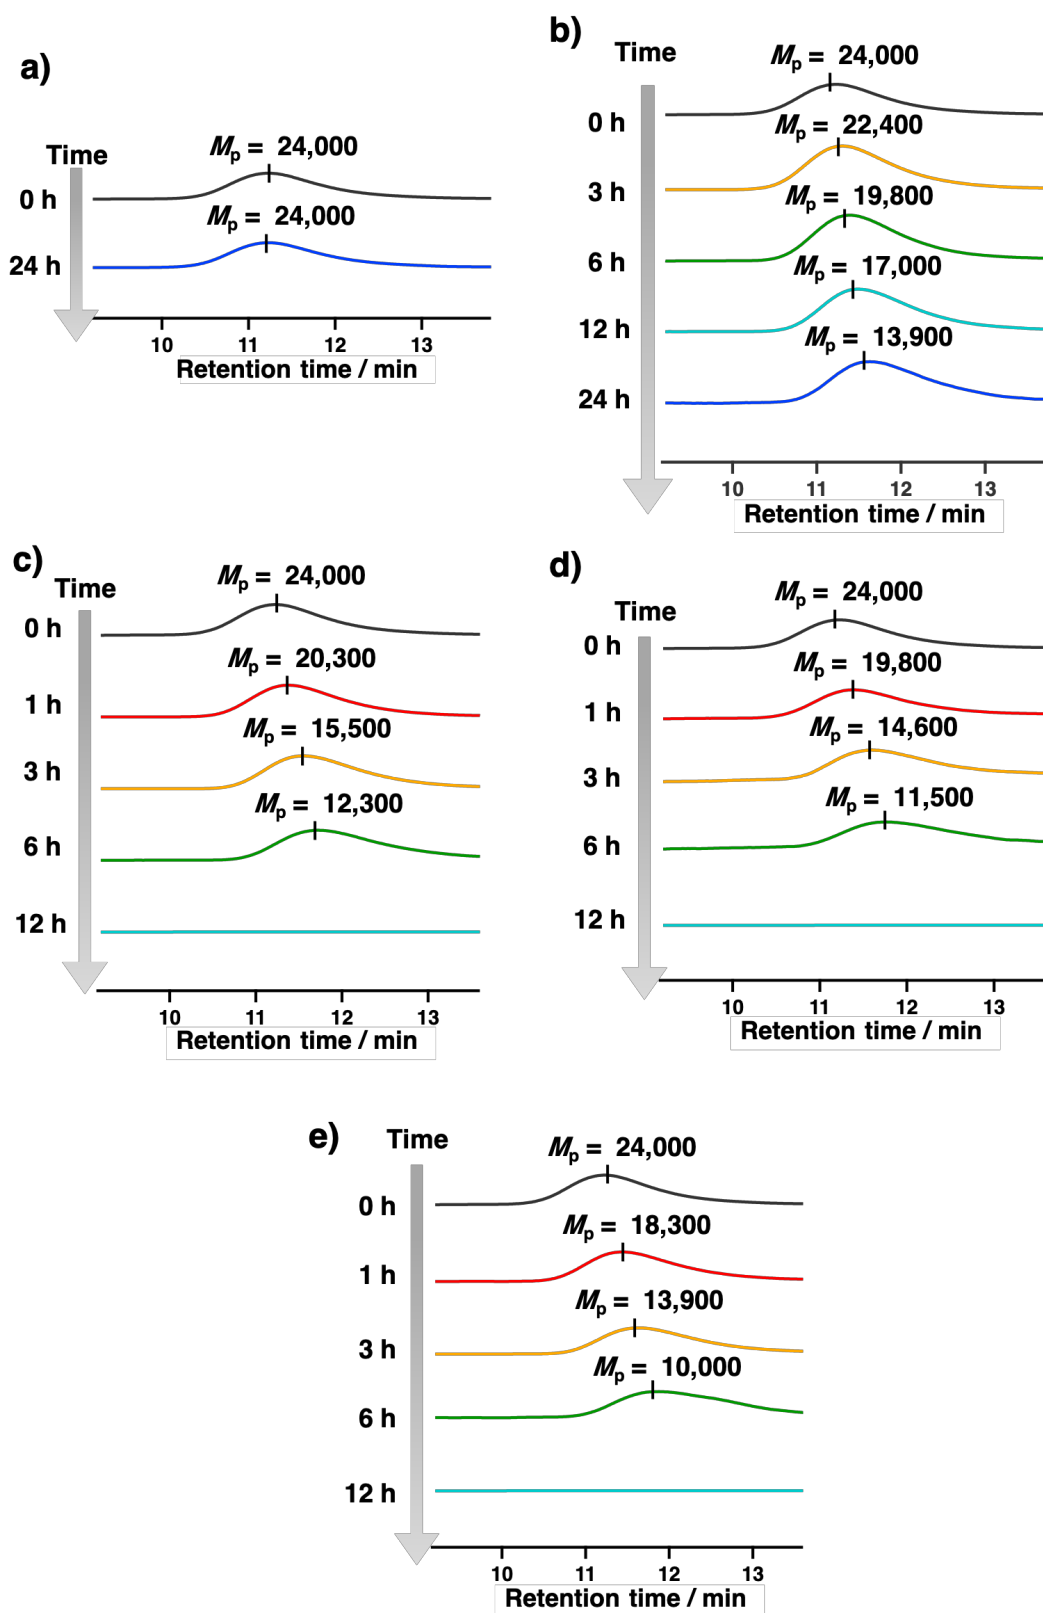

**Figure S-10.** GPC profiles of the degradation products during ammonolysis under the reaction condition of (a)  $[\text{NH}_3]_0/[\text{PIC}]_0 = 0$ , (b)  $[\text{NH}_3]_0/[\text{PIC}]_0 = 10$ , (c)  $[\text{NH}_3]_0/[\text{PIC}]_0 = 30$ , (d)  $[\text{NH}_3]_0/[\text{PIC}]_0 = 40$ , (e)  $[\text{NH}_3]_0/[\text{PIC}]_0 = 50$  (eluent: DMF, detector: RI, polystyrene standard).

## 2.5. Ammonolysis at different reaction temperature

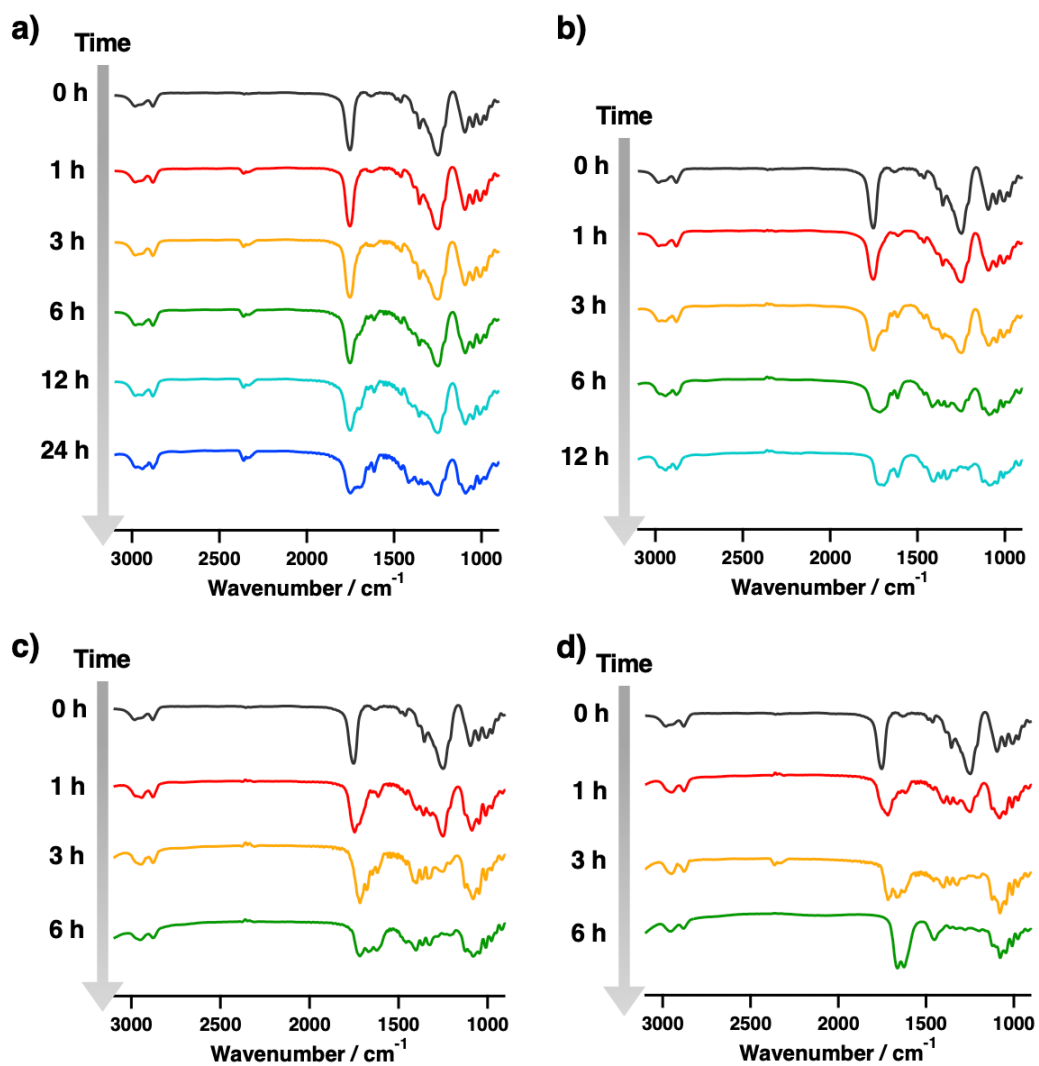

**Figure S-11.** FT-IR spectra of the degradation products during ammonolysis at (a) 10 °C, (b) 50 °C, (c) 70 °C, and (d) 90 °C (KBr).

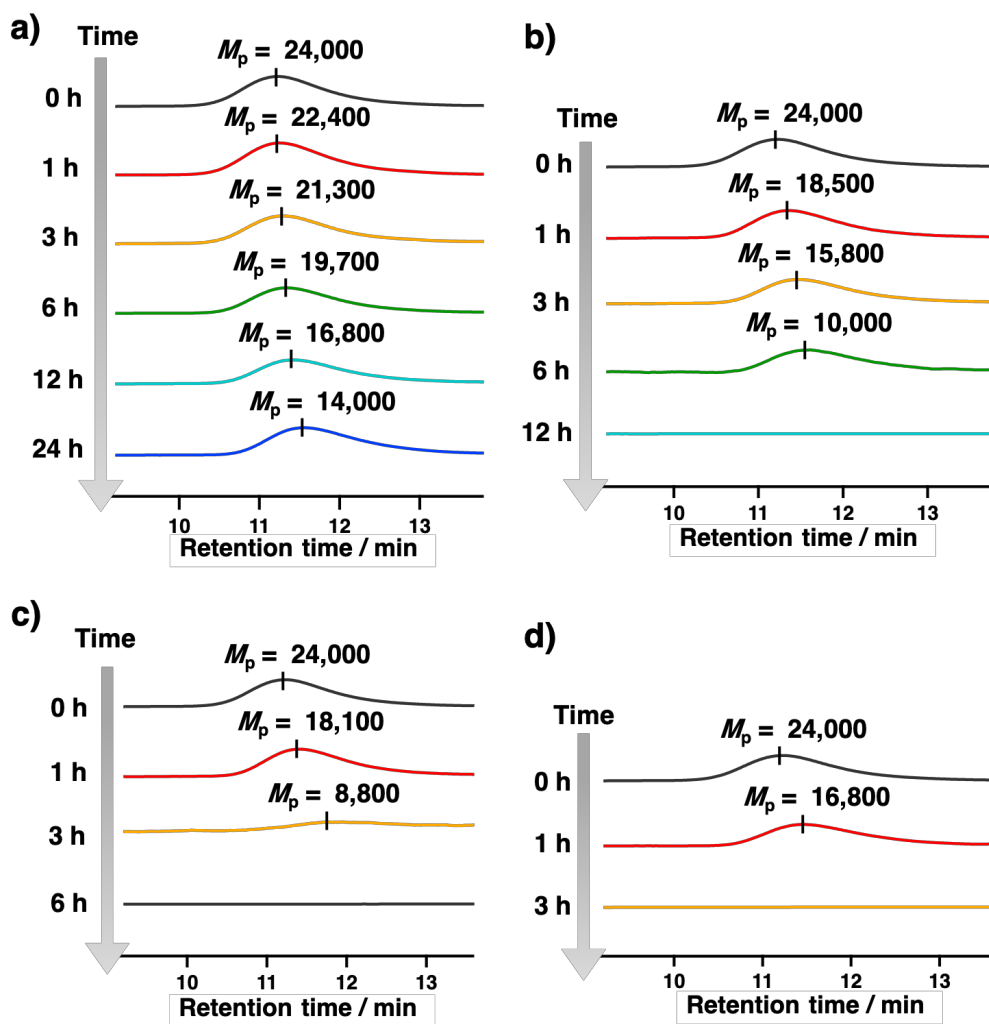

**Figure S-12.** GPC profiles of the degradation products during ammonolysis at (a) 10 °C, (b) 50 °C, (c) 70 °C, and (d) 90 °C (eluent: DMF, detector: RI, polystyrene standard).

## 2.6. Calculation of yield of the degradation products

Yield of ISB under the ammonolysis reaction condition at the reaction condition of 30 °C and  $[\text{NH}_3]_0/[\text{PIC}]_0 = 30$  was calculated in the similar manner in the case of the reaction condition at the reaction condition of 90 °C and  $[\text{NH}_3]_0/[\text{PIC}]_0 = 30$ . PIC (50 mg) was placed in round-bottomed flask (30 mL), and water (1.80 mL) and aqueous ammonia (0.600 mL) were added. The reaction mixture was stirred for 24 h, and was freeze-dried to remove water and ammonia. Here, DMSO- $d_6$  (2.00 mL) and toluene (50.0  $\mu\text{L}$ , internal standard) were added to the dried sample to prepare a solution for  $^1\text{H}$  NMR measurement (sample: 1.00 mL).

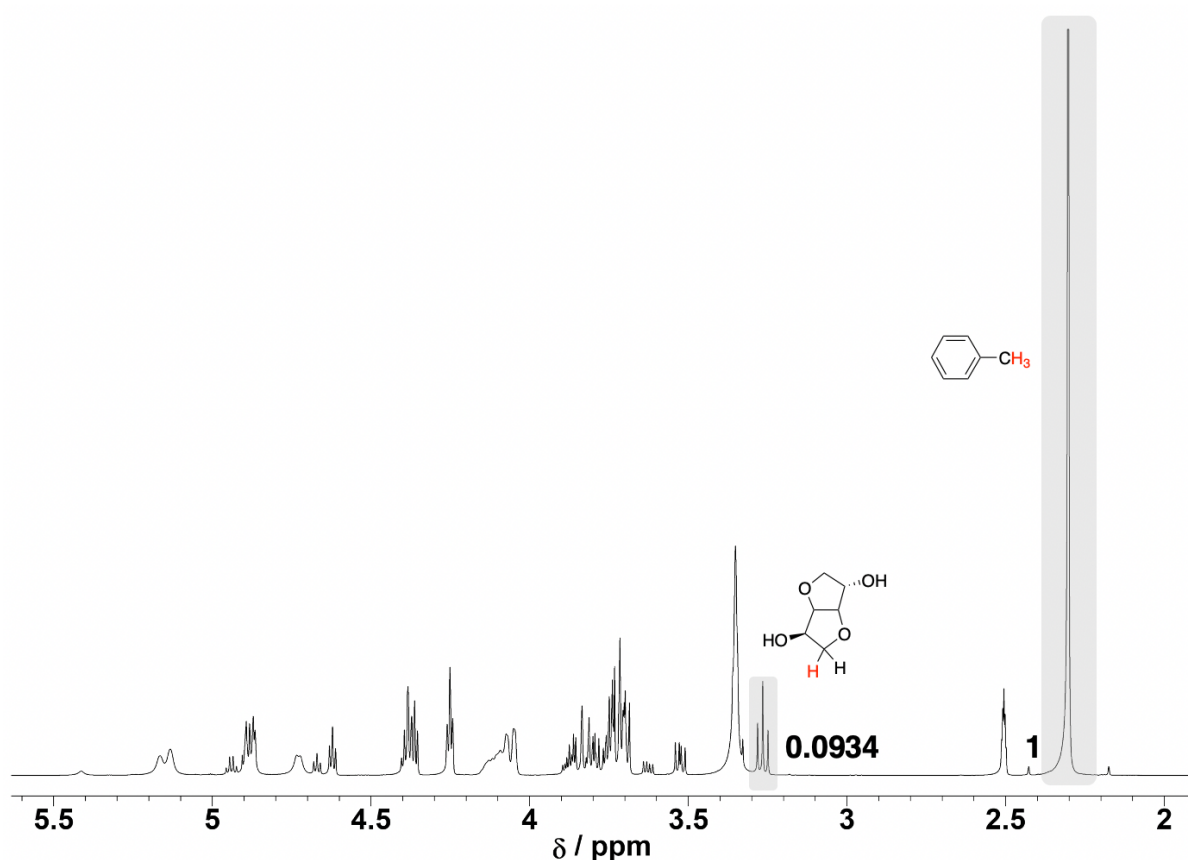

**Figure S-13.**  $^1\text{H}$  NMR spectrum of the degradation products after 24 h with the reaction condition of 30 °C and  $[\text{NH}_3]_0/[\text{PIC}]_0 = 30$  (500 MHz, 25 °C, DMSO- $d_6$ ). The number next to the signal of ISB (around 3.27 ppm) is the integration ratio of the signal of toluene (around 2.30 ppm).

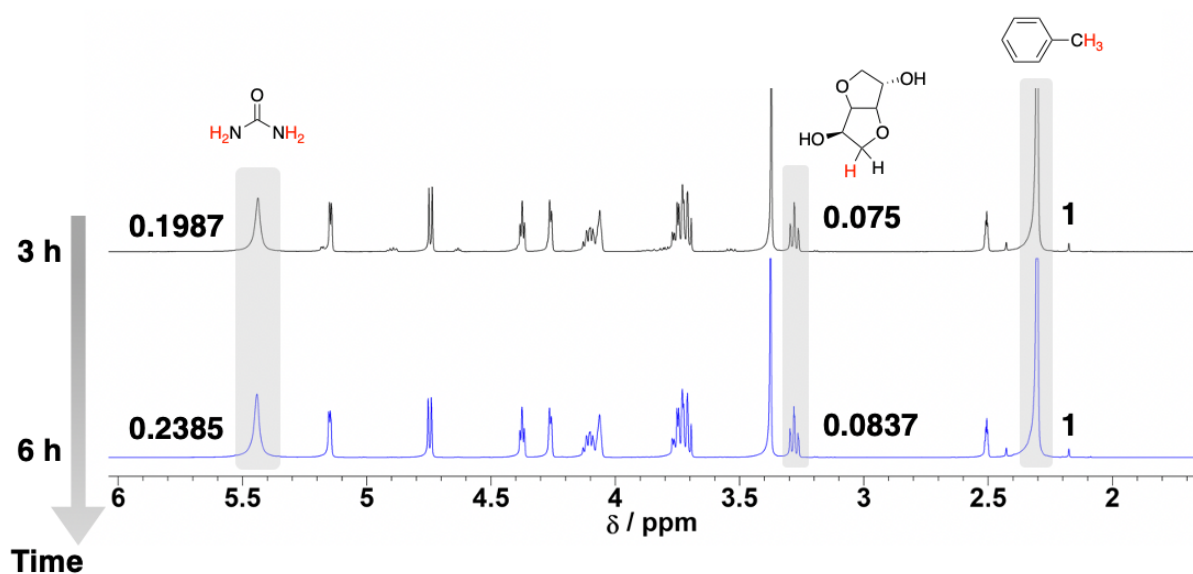

**Figure S-14.**  $^1\text{H}$  NMR spectra of the degradation products during the ammonolysis with the reaction condition of  $90\text{ }^\circ\text{C}$  and  $[\text{NH}_3]_0/[\text{PIC}]_0 = 30$  (500 MHz,  $25\text{ }^\circ\text{C}$ ,  $\text{DMSO-}d_6$ ). The yield of ISB and urea was calculated by the integration ratio written next to gray square against the methyl proton of toluene (2.3 ppm).

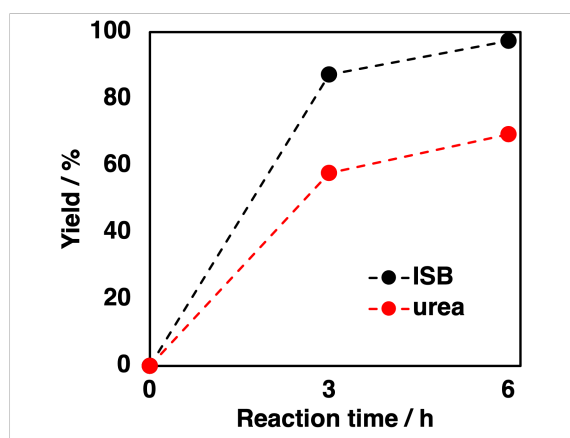

**Figure S-15.** Yield of ISB and urea during ammonolysis with the reaction condition of  $90\text{ }^\circ\text{C}$  and  $[\text{NH}_3]_0/[\text{PIC}]_0 = 30$ .

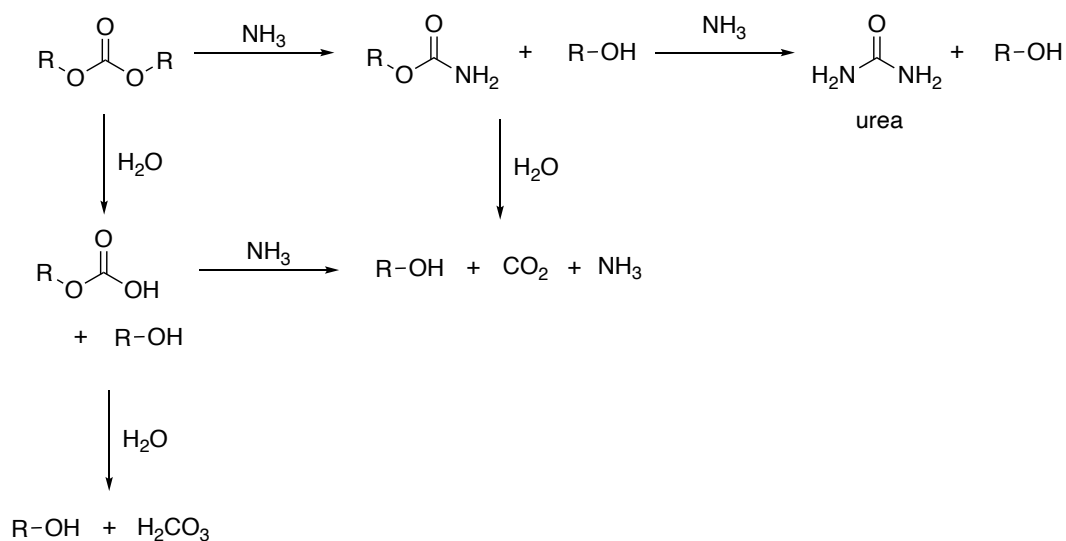

**Scheme S-4.** Considerable reaction during the ammonolysis of PIC.

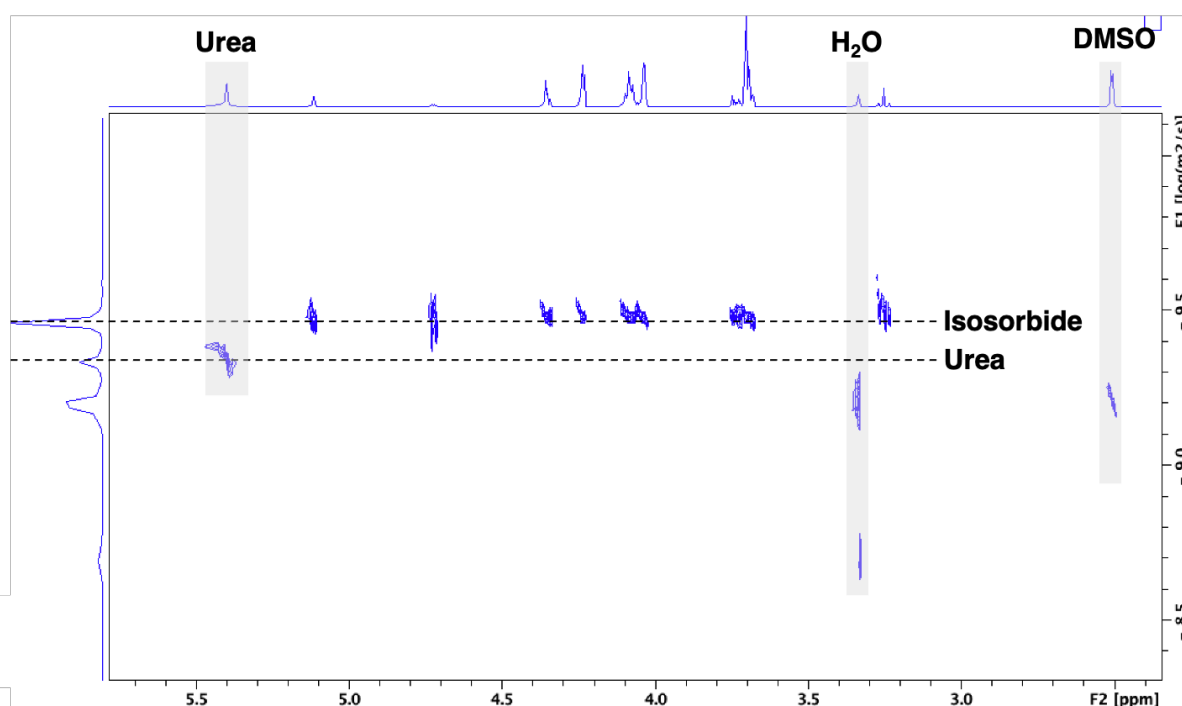

**Figure S-16.**  $^1\text{H}$  DOSY NMR spectrum of the degradation product after 6 h under the reaction condition of 90 °C and  $[\text{NH}_3]_0/[\text{PIC}]_0 = 30$  (500 MHz, 25 °C,  $\text{DMSO-}d_6$ ).

## 2.7. Mass balance of the ammonolysis of PIC at the optimized reaction condition

**Table S-1.** Mass balance of the ammonolysis of PIC at optimized reaction condition

|                            | PIC    | NH <sub>3</sub>     | ISB                 | Urea                 | Total  |
|----------------------------|--------|---------------------|---------------------|----------------------|--------|
| Input                      | 250 mg | 756 mg              | 0 mg                | 0 mg                 | 1.01 g |
| Output (theoretical)       | 0 mg   | 706 mg              | 212 mg              | 87.2 mg              | 1.01 g |
| Output (experimental)      | 0 mg   | 648 mg <sup>a</sup> | 207 mg <sup>b</sup> | 60.5 mg <sup>b</sup> | 916 mg |
| Ratio to theoretical value | 100%   | 91.7%               | 97.4%               | 69.4%                | 90.7%  |

a) Calculated from titration experiment. The water solution containing the degradation product was acidified with 50 mL of 1 M nitric acid, which was titrated with 0.1 M NaOH. b) Calculated from <sup>1</sup>H NMR spectrum.

## 2.8. Ammonia reusing test

First ammonolysis reaction was conducted in the same manner as the optimized condition (90 °C, 30eq. of ammonia). The ammonia aqueous solution of the degradation products in the flask was then stored at 5 °C for 17 h, followed by addition of further PIC (250 mg). The reaction mixture was heated again to 90 °C and stirred for another 6 h, the part of which was collected, freeze-dried and analyzed by  $^1\text{H}$  NMR. Furthermore, the titration measurement of the residual ammonia after second ammonolysis experiment was performed to show the effective use of ammonia in this study.

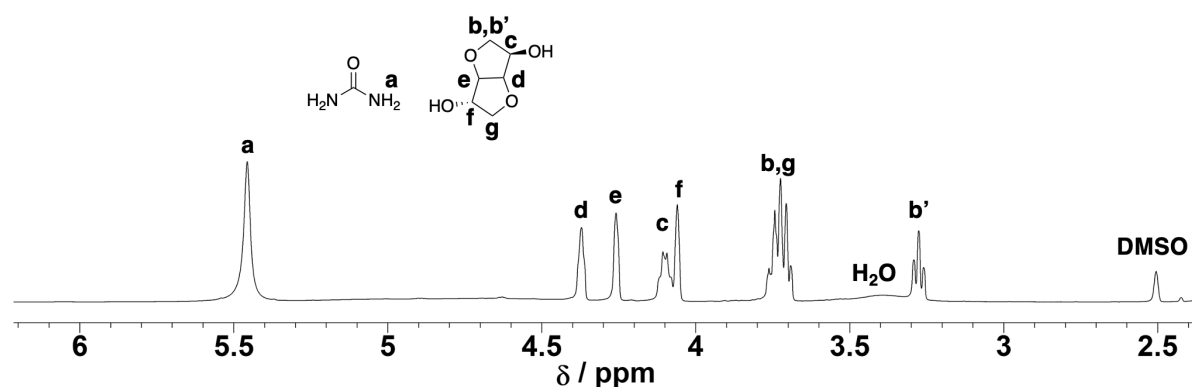

**Figure S17.**  $^1\text{H}$  NMR spectrum of the degradation product after 6 h in second time ammonolysis of PIC.

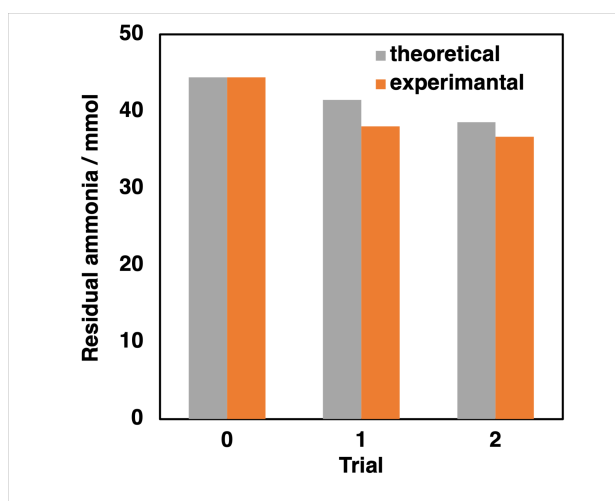

**Figure S18.** Residual ammonia amount after each ammonolysis experiment of PIC. The data of trial 1 was calculated from the mass balance (**Table S1**) of the ammonolysis experiment.



### 3. plant-growth test

**Table S-2.** Adjustment condition of fertilizer solution

| Entry                                       | 1       | 2       | 3       | 4       | 5       | 6       |
|---------------------------------------------|---------|---------|---------|---------|---------|---------|
| 200×Pi                                      | 1.25 mL |
| 200×Mg                                      | 1.25 mL |
| 200×micro                                   | 1.25 mL |
| 1M CaCl <sub>2</sub>                        | 500 µL  |
| 200×K <sub>2</sub> SO <sub>4</sub> (300 mM) | 1.25 mL |
| 300 mM urea                                 | 2.50 mL | 0 mL    | 0 mL    | 0 mL    | 0 mL    | 0 mL    |
| 300 mM ISB                                  | 0 mL    | 0 mL    | 0 mL    | 2.5 mL  | 0.25 mL | 0 mL    |
| 300 mM urea & ISB                           | 0 mL    | 2.50 mL | 0 mL    | 0 mL    | 0 mL    | 0 mL    |
| 300 mM degradation products                 | 0 mL    | 0 mL    | 2.50 mL | 0 mL    | 0 mL    | 0 mL    |

200 x Pi: 350 mM NaH<sub>2</sub>PO<sub>4</sub>, 350 mM Na<sub>2</sub>HPO<sub>4</sub>

200 x Mg: 300 mM MgSO<sub>4</sub>

200 x micro: 200 µM CuSO<sub>4</sub>, 6 mM H<sub>3</sub>BO<sub>3</sub>, 34 µM (NH<sub>4</sub>)<sub>6</sub>Mo<sub>7</sub>O<sub>24</sub>, 26 µM CoCl<sub>2</sub>, 13.4 mM Na<sub>2</sub>-EDTA, 1.72 mM FeSO<sub>4</sub>, 2.06 mM MnSO<sub>4</sub>, 200 µM ZnSO<sub>4</sub>

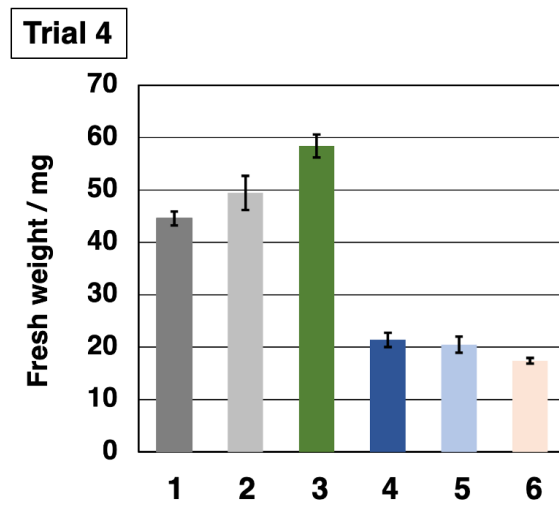

**Figure S19.** Fresh weight of *Arabidopsis thaliana* grown by using different additive.
